# Supplementary material for: Shift of symbiont communities in Acropora tenuis juveniles under heat stress
Source: PeerJ. 2017 Dec 13;5:e4055. doi: 10.7717/peerj.4055 (PMC5732543; doi:10.7717/peerj.4055)
Supplement: Supplemental Information 2 [file peerj-05-4055-s006.xlsx]

## Sheet: Oda
	Ind. ID	A	C	D				treatment	ind no	A	C	D		A	C	D	AC	AD	CD	ACD
ambient	0d1101	1	0	1				a	30	19	12	14		6	8	2	2	10	1	1
	0d1102	0	1	0				a1	10	4	4	4
	0d1103	0	0	1				a2	10	10	0	8
	0d1104	0	1	1				a3	10	5	8	2
	0d1105	0	0	1
	0d1106	0	1	0				30	29	27	6	8		14	1	0	5	8	0	0
	0d1107	1	0	0				30-1	10	8	3	4
	0d1108	0	1	0				30-2	10	10	3	3
	0d1109	1	0	0				30-3	9	9	0	1
	0d1110	1	0	0
	0d1201	1	0	1				32	30	23	8	5		16	6	0	2	5	0	0
	0d1202	1	0	0				32-1	10	9	1	4
	0d1203	1	0	1				32-2	10	9	2	1
	0d1204	1	0	0				32-3	10	5	5	0
	0d1205	1	0	1
	0d1206	1	0	1
	0d1207	1	0	1
	0d1208	1	0	1
	0d1209	1	0	1
	0d1210	1	0	1
	0d1301	1	0	1
	0d1302	1	1	0
	0d1303	1	1	1
	0d1304	0	1	0
	0d1305	0	1	0
	0d1306	0	1	0
	0d1307	1	0	0
	0d1308	0	1	0
	0d1309	0	1	0
	0d1310	1	1	0
30	0d2101	1	0	1
	0d2102	1	1	0
	0d2103	0	0	0
	0d2104	0	1	0
	0d2105	1	1	0
	0d2106	1	0	0
	0d2107	1	0	0
	0d2108	1	0	1
	0d2109	1	0	1
	0d2110	1	0	1
	0d2201	1	0	0
	0d2202	1	0	0
	0d2203	1	0	0
	0d2204	1	0	1
	0d2205	1	1	0
	0d2206	1	0	0
	0d2207	1	1	0
	0d2208	1	1	0
	0d2209	1	0	1
	0d2210	1	0	1
	0d2301	1	0	1
	0d2302	1	0	0
	0d2303	1	0	0
	0d2304	1	0	0
	0d2305	1	0	0
	0d2306	1	0	0
	0d2307	1	0	0
	0d2308	1	0	0
	0d2309	1	0	0
	0d2310	lost
32	0d3101	1	0	1
	0d3102	1	0	0
	0d3103	1	0	1
	0d3104	1	0	0
	0d3105	1	0	0
	0d3106	1	0	0
	0d3107	1	0	1
	0d3108	1	0	0
	0d3109	0	1	0
	0d3110	1	0	1
	0d3201	1	0	1
	0d3202	1	0	0
	0d3203	1	0	0
	0d3204	1	0	0
	0d3205	1	0	0
	0d3206	1	1	0
	0d3207	1	0	0
	0d3208	1	0	0
	0d3209	0	1	0
	0d3210	1	0	0
	0d3301	0	1	0
	0d3302	0	1	0
	0d3303	0	1	0
	0d3304	1	1	0
	0d3305	1	0	0
	0d3306	0	1	0
	0d3307	1	0	0
	0d3308	1	0	0
	0d3309	0	0	0
	0d3310	1	0	0

## Sheet: 1mo
	Ind. ID	A	C	D				treatment	ind no	A	C	D			A	C	D	AC	AD	CD	ACD
ambient	1m1101	1	0	0				a	30	14	11	15			5	10	5	0	9	1	0
	1m1102	1	0	1				a1	10	4	4	4
	1m1103	0	1	0				a2	10	6	2	5
	1m1104	0	1	0				a3	10	4	5	6
	1m1105	0	0	1
	1m1106	0	1	0				30	27	20	6	7			16	4	1	0	4	2	0
	1m1107	0	0	1				30-1	10	6	3	4
	1m1108	1	0	0				30-2	8	8	0	2
	1m1109	1	0	1				30-3	9	6	3	1
	1m1110	0	1	0
	1m1201	0	0	1				32	25	15	6	12			8	4	6	1	5	0	1
	1m1202	0	0	1				32-1	7	2	2	3
	1m1203	1	0	1				32-2	9	7	2	4
	1m1204	1	0	1				32-3	9	6	2	5
	1m1205	0	1	0
	1m1206	1	0	0
	1m1207	1	0	0
	1m1208	1	0	1
	1m1209	1	0	0
	1m1210	0	1	0
	1m1301	1	0	1
	1m1302	0	0	1
	1m1303	1	0	1
	1m1304	1	0	1
	1m1305	1	0	1
	1m1306	0	1	0
	1m1307	0	1	0
	1m1308	0	1	0
	1m1309	0	1	0
	1m1310	0	1	1
30	1m2101	1	0	1
	1m2102	0	0	1
	1m2103	1	0	0
	1m2104	1	0	0
	1m2105	1	0	0
	1m2106	1	0	0
	1m2107	1	0	0
	1m2108	0	1	1
	1m2109	0	1	1
	1m2110	0	1	0
	1m2201	1	0	0
	1m2202	1	0	0
	1m2203	1	0	0
	1m2204	-	-	-
	1m2205	1	0	1
	1m2206	-	-	-
	1m2207	1	0	0
	1m2208	1	0	0
	1m2209	1	0	0
	1m2210	1	0	1
	1m2301	1	0	1
	1m2302	-	-	-
	1m2303	1	0	0
	1m2304	1	0	0
	1m2305	0	1	0
	1m2306	1	0	0
	1m2307	1	0	0
	1m2308	0	1	0
	1m2309	0	1	0
	1m2310	1	0	0
32	1m3101	1	0	0
	1m3102	0	0	1
	1m3103	0	0	1
	1m3104	-	-	-
	1m3105	-	-	-
	1m3106	0	1	0
	1m3107	0	0	1
	1m3108	-	-	-
	1m3109	1	0	0
	1m3110	0	1	0
	1m3201	1	0	0
	1m3202	1	0	0
	1m3203	1	1	1
	1m3204	0	0	1
	1m3205	1	0	0
	1m3206	1	0	0
	1m3207	1	0	1
	1m3208	0	0	1
	1m3209	-	-	-
	1m3210	1	1	0
	1m3301	1	0	0
	1m3302	1	0	1
	1m3303	0	1	0
	1m3304	-	-	-
	1m3305	0	1	0
	1m3306	1	0	0
	1m3307	1	0	1
	1m3308	1	0	1
	1m3309	1	0	1
	1m3310	0	0	1

## Sheet: 2mo
	Ind. ID	A	C	D				treatment	ind no	A	C	D		A	C	D	AC	AD	CD	ACD
ambient	2m1101	1	0	1				a	29	13	10	13		5	8	8	3	4	1	0
	2m1102	0	1	0				a1	10	8	2	4
	2m1103	1	0	0				a2	9	2	4	4
	2m1104	1	0	0				a3	10	3	4	5
	2m1105	0	0	1
	2m1106	1	0	0				30	30	14	8	22		3	4	10	1	9	2	1
	2m1107	1	0	0				30-1	10	2	3	6
	2m1108	1	0	1				30-2	10	5	2	9
	2m1109	1	1	0				30-3	10	7	3	7
	2m1110	1	0	1
	2m1201	-	-	-				32	21	9	1	20		0	1	11	0	9	0	0
	2m1202	1	0	1				32-1	3	0	0	3
	2m1203	0	0	1				32-2	9	5	1	8
	2m1204	0	1	0				32-3	9	4	0	9
	2m1205	0	1	0
	2m1206	1	0	0
	2m1207	0	1	0
	2m1208	0	1	0
	2m1209	0	0	1
	2m1210	0	0	1
	2m1301	0	1	0
	2m1302	0	0	1
	2m1303	1	0	1
	2m1304	0	0	1
	2m1305	0	1	0
	2m1306	0	0	1
	2m1307	0	0	1
	2m1308	1	0	0
	2m1309	0	1	0
	2m1310	1	1	0
30	2m2101	0	1	0
	2m2102	0	0	1
	2m2103	0	1	0
	2m2104	0	0	1
	2m2105	0	0	1
	2m2106	1	1	0
	2m2107	1	0	0
	2m2108	0	0	1
	2m2109	0	0	1
	2m2110	0	0	1
	2m2201	0	0	1
	2m2202	1	0	1
	2m2203	1	1	1
	2m2204	0	0	1
	2m2205	0	1	0
	2m2206	1	0	1
	2m2207	1	0	1
	2m2208	1	0	1
	2m2209	0	0	1
	2m2210	0	0	1
	2m2301	0	1	1
	2m2302	1	0	1
	2m2303	1	0	0
	2m2304	1	0	1
	2m2305	1	0	1
	2m2306	1	0	1
	2m2307	1	0	0
	2m2308	0	1	0
	2m2309	1	0	1
	2m2310	0	1	1
32	2m3101	0	0	1
	2m3102	0	0	1
	2m3103	0	0	1
	2m3201	0	0	1
	2m3202	0	0	1
	2m3203	1	0	1
	2m3204	1	0	1
	2m3205	1	0	1
	2m3206	1	0	1
	2m3207	0	1	0
	2m3208	1	0	1
	2m3209	-	-	-
	2m3210	0	0	1
	2m3301	0	0	1
	2m3302	0	0	1
	2m3303	0	0	1
	2m3304	1	0	1
	2m3305	1	0	1
	2m3306	0	0	1
	2m3307	1	0	1
	2m3308	0	0	1
	2m3309	1	0	1
