# Supplementary material for: Shift of symbiont communities in Acropora tenuis juveniles under heat stress
Source: PeerJ. 2017 Dec 13;5:e4055. doi: 10.7717/peerj.4055 (PMC5732543; doi:10.7717/peerj.4055)
Supplement: Supplemental Information 4 [file peerj-05-4055-s008.xlsx]

## Sheet: 2012Survivorship
Treatment	Tile ID	0d		2w		1m		2m		3m		4m
		live	collected	live	collected	live	collected	live	collected	live	collected	live	collected
ambient	1-1-1	74	12	48	9	23	7	4	1	3	1	2	2
	1-1-2	84	7	34	7	28	7	19	2	17	6	10	4
	1-1-3	50	4	28	5	15	5	4	1	3	1	2	2
	1-1-4	71	4	53	5	29	5	12	2	10	5	5	3
	1-1-5	51	3	47	4	27	4	9	1	8	4	4	3
	1-1-6	41	2	19	3	7	3	3	1	2	1	1	1
	1-1-7	25	2	21	2	15	2	4	1	3	1	2	2
	1-1-8	34	2	24	2	9	2	5	1	4	1	3	3
	1-2-1	71	8	40	6	31	5	20	4	16	5	11	3
	1-2-2	73	12	46	7	29	7	17	4	13	4	9	3
	1-2-3	50	5	37	5	25	3	14	4	10	4	6	3
	1-2-4	59	4	46	5	38	5	13	4	9	2	7	3
	1-2-5	45	3	24	3	18	3	6	1	5	1	4	2
	1-2-6	38	2	31	3	22	2	8	1	7	2	5	3
	1-2-7	34	2	16	2	6	2	3	1	2	1	1	1
	1-2-8	17	1	15	1	10	2	6	1	5	1	4	2
30	2-1-1	91	9	80	9	64	6	24	5	19	4	15	3
	2-1-2	97	5	78	6	59	5	33	5	28	4	24	3
	2-1-3	91	7	80	5	54	3	26	4	22	4	18	3
	2-1-4	63	4	57	4	36	3	13	2	11	2	9	3
	2-1-5	45	4	35	3	15	3	9	1	8	2	6	2
	2-1-6	14	2	12	4	8	4	4	1	3	1	2	2
	2-1-7	30	2	26	3	15	2	8	1	7	2	5	2
	2-1-8	28	2	24	2	10	2	4	1	3	1	2	2
	2-2-1	123	6	111	3	81	6	40	6	34	7	27	3
	2-2-2	62	6	53	7	34	7	18	3	15	3	12	3
	2-2-3	63	5	51	4	47	9	18	3	15	3	12	3
	2-2-4	61	4	56	5	46	5	13	2	11	2	9	3
	2-2-5	49	3	39	6	32	3	15	3	12	2	10	3
	2-2-6	37	2	33	2	30	3	18	3	15	3	12	2
	2-2-7	20	2	15	2	14	2	3	0	3	0	3	2
	2-2-8	11	1	7	1	6	2	1	0	1	0	1	1
31	3-1-1	66	8	53	6	23	6	8	3	5	2	3	3
	3-1-2	80	7	69	6	43	7	7	2	4	1	3	2
	3-1-3	69	6	61	6	39	4	10	3	7	4	3	3
	3-1-4	63	0	58	8	13	4	4	1	3	1	2	2
	3-1-5	38	1	31	4	10	4	1	0	1	1	0	0
	3-1-6	29	2	24	3	10	2	1	0	1	0	1	1
	3-1-7	23	1	20	1	17	2	1	0	1	1	0	0
	3-1-8	32	2	20	2	16	2	2	1	1	0	1	1
	3-2-1	136	9	124	7	111	5	24	4	20	10	10	6
	3-2-2	78	6	71	8	47	5	11	1	10	4	6	6
	3-2-3	49	6	41	4	37	4	3	1	2	1	1	1
	3-2-4	71	4	64	5	54	3	3	1	2	1	1	1
	3-2-5	41	4	37	4	30	5	6	1	5	2	3	3
	3-2-6	40	2	37	2	32	2	3	1	1	0	1	1
	3-2-7	32	2	29	2	23	2	6	1	5	2	3	2
	3-2-8	22	2	20	2	16	2	0	0	0	0	0	0

## Sheet: 2013Survivorship
Treatment	Tile ID	0d		1m		2m
		live	collected	live	collected	live	collected
ambient	1-1-1	25	0	24	0	8	1
	1-1-2	37	0	29	0	15	3
	1-1-3	33	0	33	2	6	1
	1-1-4	44	0	39	0	13	3
	1-1-5	46	0	46	3	3	1
	1-1-6	146	10	122	5	6	1
	1-2-1	25	0	13	0	4	1
	1-2-2	31	0	31	2	12	2
	1-2-3	33	0	29	2	11	2
	1-2-4	41	0	38	3	26	2
	1-2-5	46	0	42	3	3	1
	1-2-6	112	10	18	0	6	2
	1-3-1	25	0	24	2	1	1
	1-3-2	31	0	23	1	1	1
	1-3-3	34	0	29	2	3	3
	1-3-4	40	0	18	0	0	0
	1-3-5	46	4	26	2	2	2
	1-3-6	89	6	54	3	4	3
30	2-1-1	25	0	25	0	22	2
	2-1-2	30	0	29	0	22	2
	2-1-3	35	0	35	2	16	1
	2-1-4	40	0	40	2	14	1
	2-1-7	48	0	48	3	37	2
	2-1-8	87	10	77	3	36	2
	2-2-1	25	0	25	1	3	1
	2-2-2	30	0	27	1	13	2
	2-2-3	35	0	32	1	14	2
	2-2-4	40	0	40	2	7	2
	2-2-5	49	4	42	2	6	2
	2-2-6	79	6	49	3	4	1
	2-3-1	26	0	26	0	20	2
	2-3-2	29	0	29	0	16	1
	2-3-3	36	0	32	2	25	2
	2-3-4	40	0	40	3	30	2
	2-3-5	49	4	42	2	22	1
	2-3-6	75	6	69	3	46	2
32	3-1-1	27	0	6	1	0	0
	3-1-2	29	0	10	2	2	2
	3-1-3	36	0	12	1	0	0
	3-1-4	40	0	6	1	0	0
	3-1-5	50	5	15	3	0	0
	3-1-6	71	5	20	2	1	1
	3-2-1	27	0	6	1	2	2
	3-2-2	29	0	12	2	3	3
	3-2-3	38	0	13	1	2	2
	3-2-4	39	0	6	1	0	0
	3-2-5	60	6	26	3	2	2
	3-2-6	66	4	10	2	1	1
	3-3-1	28	0	10	1	0	0
	3-3-2	29	0	8	1	0	0
	3-3-3	38	0	8	1	0	0
	3-3-4	38	0	14	1	0	0
	3-3-5	62	4	26	2	0	0
	3-3-6	64	6	50	4	9	9

## Sheet: 2012Growth
Treatment	0d				2w				1m				2m				3m				4m
	Ind ID	Major	Minor	GMD	Ind ID	Major	Minor	GMD	Ind ID	Major	Minor	GMD	Ind ID	Major	Minor	GMD	Ind ID	Major	Minor	GMD	Ind ID	Major	Minor	GMD
ambient	At0d1101	1.08	1.02	1.04957	At2w1101	1.06	1.04	1.04995	At1m1101	1.3	1.2	1.249	At2m1101	1.54	1.46	1.49947	At3m1101	6.72	5.28	5.95664	At4m1101	-	-	-
	At0d1102	1.72	1.5	1.60624	At2w1102	-	-	-	At1m1102	1.2	1.1	1.14891	At2m1102	1.76	1.5	1.62481	At3m1102	4.8	3.92	4.33774	At4m1102	-	-	-
	At0d1103	1.26	1.02	1.13367	At2w1103	-	-	-	At1m1103	2	1.4	1.67332	At2m1103	2.36	2	2.17256	At3m1103	3.36	3.2	3.27902	At4m1103	6	5	5
	At0d1104	1.3	1.08	1.18491	At2w1104	1.08	1.04	1.05981	At1m1104	1.18	1	1.08628	At2m1104	2.1	1.86	1.97636	At3m1104	3.6	2.72	3.12922	At4m1104	3.5	3	3
	At0d1105	1.28	1.24	1.25984	At2w1105	1.8	1.16	1.44499	At1m1105	1.3	1	1.14018	At2m1105	2.26	1.7	1.9601	At3m1105	6	4.64	5.27636	At4m1105	4.5	4	4
	At0d1106	1.66	1	1.28841	At2w1106	2.24	2	2.1166	At1m1106	1.16	0.96	1.05527	At2m1106	1.96	1.9	1.92977	At3m1106	3.76	3.52	3.63802	At4m1106	-	-	-
	At0d1107	1.16	0.98	1.06621	At2w1107	2.4	1.7	2.0199	At1m1107	1.16	1.1	1.1296	At2m1107	1.54	1.5	1.51987	At3m1107	3.12	2.4	2.73642	At4m1107	4.2	3.4	3.4
	At0d1108	1.32	1	1.14891	At2w1108	1.6	1.16	1.36235	At1m1108	1.2	1.2	1.2	At2m1108	4	2.52	3.1749	At3m1108	3.12	2.8	2.95567	At4m1108	6.7	5.4	5.4
	At0d1109	0.96	0.92	0.939787	At2w1109	2.2	1.3	1.69115	At1m1109	1.34	1.1	1.21408	At2m1109	1.8	1.6	1.69706	At3m1109	6.24	4.96	5.56331	At4m1109	6.6	5	5
	At0d1110	1.3	1.2	1.249	At2w1110	2	1.76	1.87617	At1m1110	1.1	0.96	1.02762	At2m1110	2.4	1.74	2.04353	At3m1110	4.8	3.44	4.0635	At4m1110	3.7	3.4	3.4
	At0d1111	0.94	0.9	0.919783	At2w1111	-	-	-	At1m1111	2	1.3	1.61245					At3m1111	4	3.04	3.48712	At4m1111	-	-	-
	At0d1112	1.36	1.04	1.18929	At2w1112	1	0.84	0.916515	At1m1112	1.8	1.06	1.3813					At3m1112	4.32	3.68	3.98718	At4m1112	5.3	3.2	3.2
	At0d1113	0.84	0.7	0.766812	At2w1113	-	-	-	At1m1113	1	0.9	0.948683					At3m1113	3.2	3.2	3.2	At4m1113	3.7	3.5	3.5
	At0d1114	1.4	0.98	1.17132	At2w1114	1.14	1.12	1.12996	At1m1114	1	1	1					At3m1114	4.32	3.68	3.98718	At4m1114	-	-	-
	At0d1115	1.8	1.18	1.45739	At2w1115	1.2	1	1.09545	At1m1115	1.4	1.2	1.29615					At3m1115	3.28	2.8	3.03051	At4m1115	-	-	-
	At0d1116	1.4	1.06	1.2182	At2w1116	1.66	1.2	1.41138	At1m1116	1.76	1.5	1.62481					At3m1116	3.44	2.88	3.14757	At4m1116	3.7	3	3
	At0d1117	1.62	1.3	1.45121	At2w1117	2.46	1.4	1.8558	At1m1117	1.24	1.06	1.14647					At3m1117	3.6	3.12	3.35142	At4m1117	3.5	3.4	3.4
	At0d1118	2	1.5	1.73205	At2w1118	1.32	1.22	1.26902	At1m1118	-	-	-					At3m1118	4.64	3.2	3.85331	At4m1118	-	-	-
	At0d1119	1.2	1.16	1.17983	At2w1119	1.56	1.18	1.35676	At1m1119	2	1.56	1.76635					At3m1119	1.36	1.36	1.36	At4m1119	-	-	-
	At0d1120	1.36	1.2	1.2775	At2w1120	1.14	1.12	1.12996	At1m1120	2.3	1.86	2.06833					At3m1120	2	1.84	1.91833	At4m1120	5.6	4	4
	At0d1201	1.9	1.5	1.68819	At2w1201	1.74	1.08	1.37084	At1m1201	0.96	0.86	0.908625	At2m1201	2.92	2.4	2.64726	At3m1201	2.96	2.8	2.87889	At4m1201	4.8	4	4
	At0d1202	1	1	1	At2w1202	1.66	1.24	1.43471	At1m1202	1.76	1.28	1.50093	At2m1202	2.34	2	2.16333	At3m1202	4.8	4	4.38178	At4m1202	5.2	5.1	5.1
	At0d1203	1.54	1.38	1.45781	At2w1203	1.86	1.7	1.7782	At1m1203	0.8	0.8	0.8	At2m1203	1.6	1.4	1.49666	At3m1203	5.6	5.12	5.35462	At4m1203	6.5	5.2	5.2
	At0d1204	2	2	2	At2w1204	1.22	1.16	1.18962	At1m1204	0.78	0.76	0.769935	At2m1204	1.6	1.46	1.5284	At3m1204	-	-	-	At4m1204	-	-	-
	At0d1205	1.32	1.2	1.25857	At2w1205	1.6	1.24	1.40855	At1m1205	-	-	-	At2m1205	1.7	1.5	1.59687	At3m1205	2.96	2.88	2.91973	At4m1205	-	-	-
	At0d1206	1	0.9	0.948683	At2w1206	1	1	1	At1m1206	1.1	0.9	0.994987	At2m1206	2.44	2.04	2.23105	At3m1206	4.32	3.2	3.71806	At4m1206	3.7	3.2	3.2
	At0d1207	1.2	1.1	1.14891	At2w1207	-	-	-	At1m1207	-	-	-	At2m1207	1.2	1.16	1.17983	At3m1207	2.48	2.24	2.35695	At4m1207	5	4.1	4.1
	At0d1208	-	-	-	At2w1208	-	-	-	At1m1208	0.86	0.8	0.829458	At2m1208	2.48	2	2.22711	At3m1208	3.44	2.8	3.10355	At4m1208	-	-	-
	At0d1209	1.1	0.9	0.994987	At2w1209	1.86	1.8	1.82975	At1m1209	1.1	1.1	1.1	At2m1209	1.88	1.16	1.47675	At3m1209	5.76	5.28	5.51478	At4m1209	4.7	3.8	3.8
	At0d1210	1	0.9	0.948683	At2w1210	1.1	1.04	1.06958	At1m1210	1.2	1.06	1.12783	At2m1210	1.2	1.14	1.16962	At3m1210	2.88	2.8	2.83972	At4m1210	5.2	4.6	4.6
	At0d1211	1.2	1	1.09545	At2w1211	1	0.84	0.916515	At1m1211	1.2	1.14	1.16962	At2m1211	2.1	2	2.04939	At3m1211	4	2.8	3.34664	At4m1211	2.5	2.4	2.4
	At0d1212	1.72	1.42	1.56282	At2w1212	1.92	1.38	1.62776	At1m1212	1.8	1.64	1.71814	At2m1212	1.44	1.4	1.41986	At3m1212	3.2	3.2	3.2	At4m1212	-	-	-
	At0d1213	-	-	-	At2w1213	1.64	1.1	1.34313	At1m1213	1	0.84	0.916515	At2m1213	1.7	1.28	1.47513	At3m1213	1.76	1.68	1.71953	At4m1213	5.3	4.2	4.2
	At0d1214	1.96	1.6	1.77088	At2w1214	-	-	-	At1m1214	0.94	0.9	0.919783	At2m1214	1.64	1.6	1.61988	At3m1214	4.16	3.04	3.55618	At4m1214	-	-	-
	At0d1215	1.48	1.34	1.40826	At2w1215	1.48	1.26	1.36558	At1m1215	1.12	0.88	0.992774	At2m1215	2.48	2.12	2.29295	At3m1215	6.72	3.36	4.75176	At4m1215	3.3	2.7	2.7
	At0d1216	-	-	-	At2w1216	1.8	1.5	1.64317	At1m1216	1.4	1	1.18322	At2m1216	2.06	1.6	1.81549	At3m1216	6.16	4.4	5.20615	At4m1216	-	-	-
	At0d1217	-	-	-	At2w1217	1.3	1.24	1.26965	At1m1217	1.58	1.26	1.41096	At2m1217	2.1	1.66	1.86708	At3m1217	2.4	1.76	2.05524	At4m1217	-	-	-
	At0d1218	2.2	1.16	1.5975	At2w1218	1.6	1.36	1.47513	At1m1218	1.06	1	1.02956	At2m1218	1.44	1.2	1.31453	At3m1218	3.2	2.96	3.07766	At4m1218	3.5	3.2	3.2
	At0d1219	1.56	1.1	1.30996	At2w1219	0.96	0.92	0.939787	At1m1219	-	-	-	At2m1219	1.66	1.26	1.44624	At3m1219	2.8	2.56	2.67731	At4m1219	7.3	5.3	5.3
	At0d1220	1.26	1	1.1225	At2w1220	1.04	0.86	0.945727	At1m1220	1.22	1.14	1.17932	At2m1220	1.76	1.6	1.67809	At3m1220	6.24	5.28	5.73997	At4m1220	4.3	3.7	3.7
30	At0d2101	1.3	1.24	1.26965	At2w2101	1.04	0.96	0.9992	At1m2101	2.96	2.2	2.55186	At2m2101	2.36	1.68	1.99118	At3m2101	2.48	2.16	2.31448	At4m2101	4.7	3.7	3.7
	At0d2102	1.28	1.08	1.17576	At2w2102	1.08	0.86	0.963743	At1m2102	1.5	1.28	1.38564	At2m2102	1.44	1.4	1.41986	At3m2102	2.4	2.4	2.4	At4m2102	5.3	4.2	4.2
	At0d2103	1.62	1.18	1.38261	At2w2103	2	0.96	1.38564	At1m2103	1.16	1.1	1.1296	At2m2103	1.48	1.38	1.42913	At3m2103	1.92	1.76	1.83826	At4m2103	2.7	2.6	2.6
	At0d2104	1.22	1.08	1.14787	At2w2104	1	0.9	0.948683	At1m2104	1.54	1.2	1.35941	At2m2104	1.8	1.34	1.55306	At3m2104	-	-	-	At4m2104	3.2	2.7	2.7
	At0d2105	1	1	1	At2w2105	1.84	1.8	1.81989	At1m2105	1.16	0.84	0.987117	At2m2105	1.34	1.2	1.26807	At3m2105	-	-	-	At4m2105	4.7	3.5	3.5
	At0d2106	1	0.96	0.979796	At2w2106	1.12	0.96	1.03692	At1m2106	0.8	0.7	0.748331	At2m2106	1.96	1.4	1.6565	At3m2106	3.6	2.64	3.08286	At4m2106	4	3.5	3.5
	At0d2107	1.92	1.8	1.85903	At2w2107	1.9	1.38	1.61926	At1m2107	1.1	0.8	0.938083	At2m2107	2	1.54	1.75499	At3m2107	4.8	3.68	4.20286	At4m2107	3.5	2.7	2.7
	At0d2108	1.8	1.32	1.54143	At2w2108	1.16	1.14	1.14996	At1m2108	1	0.8	0.894427	At2m2108	1.1	1	1.04881	At3m2108	3.36	3.92	3.62921	At4m2108	5.4	4.5	4.5
	At0d2109	2.36	1.84	2.08384	At2w2109	1.12	1.04	1.07926	At1m2109	1.94	1.6	1.76182	At2m2109	2.8	2.08	2.4133	At3m2109	4.24	4.08	4.15923	At4m2109	2.8	2.7	2.7
	At0d2110	1.24	1.1	1.1679	At2w2110	1.08	1	1.03923	At1m2110	1.8	1.3	1.52971	At2m2110	1.2	1	1.09545	At3m2110	3.84	3.12	3.46133	At4m2110	4	3.2	3.2
	At0d2111	1.68	1.16	1.39599	At2w2111	1.7	1.6	1.64924	At1m2111	1.26	1.2	1.22963	At2m2111	2	1.8	1.89737	At3m2111	3.68	2.56	3.06933	At4m2111	3.8	2.5	2.5
	At0d2112	1.04	0.96	0.9992	At2w2112	1.1	1.06	1.07981	At1m2112	1.56	1.2	1.36821	At2m2112	1.14	1.1	1.11982	At3m2112	3.6	2.4	2.93939	At4m2112	4	3.8	3.8
	At0d2113	1.92	1.9	1.90997	At2w2113	1	0.98	0.989949	At1m2113	2.26	1.72	1.9716	At2m2113	1.2	1.2	1.2	At3m2113	3.44	2.8	3.10355	At4m2113	5.2	3.5	3.5
	At0d2114	1.5	1.16	1.31909	At2w2114	-	-	-	At1m2114	1.64	1.06	1.31848	At2m2114	1.64	1.44	1.53675	At3m2114	2.96	2.32	2.62053	At4m2114	5.5	5	5
	At0d2115	2.16	1.7	1.91625	At2w2115	1.1	1.04	1.06958	At1m2115	0.9	0.9	0.9	At2m2115	1.26	1.2	1.22963	At3m2115	1.68	1.52	1.598	At4m2115	5.5	3.6	3.6
	At0d2116	1.2	1.2	1.2	At2w2116	1.36	1	1.16619	At1m2116	1.2	1.1	1.14891	At2m2116	1.34	1.1	1.21408	At3m2116	2.56	3.84	3.13535	At4m2116	-	-	-
	At0d2117	1.1	1	1.04881	At2w2117	2.84	2.12	2.45373	At1m2117	1.54	1.5	1.51987	At2m2117	2.12	1.76	1.93163	At3m2117	2.8	2.16	2.45927	At4m2117	3.6	3	3
	At0d2118	2.1	1.9	1.9975	At2w2118	-	-	-	At1m2118	1.16	0.9	1.02176	At2m2118	2.52	1.32	1.82384	At3m2118	3.36	2.8	3.06725	At4m2118	4.2	3.6	3.6
	At0d2119	1.12	1.1	1.10995	At2w2119	1.66	1.2	1.41138	At1m2119	1.54	1.06	1.27765	At2m2119	1.9	1.46	1.66553	At3m2119	3.04	2.48	2.74576	At4m2119	-	-	-
	At0d2120	1.8	1.52	1.65409	At2w2120	1	0.9	0.948683	At1m2120	1.14	1	1.06771	At2m2120	1.84	1.4	1.60499	At3m2120	3.52	3.12	3.31397	At4m2120	6	5.1	5.1
	At0d2201	-	-	-	At2w2201	1.76	1.4	1.56971	At1m2201	2.14	2	2.06882	At2m2201	2.24	2.08	2.15852	At3m2201	5.6	4	4.73286	At4m2201	6.3	4.7	4.7
	At0d2202	1.52	1	1.23288	At2w2202	-	-	-	At1m2202	1.4	1.26	1.32816	At2m2202	1.16	0.86	0.998799	At3m2202	3.28	2.88	3.0735	At4m2202	4.2	3.5	3.5
	At0d2203	1.28	1.24	1.25984	At2w2203	1	0.96	0.979796	At1m2203	1.66	1.66	1.66	At2m2203	2.6	2.2	2.39165	At3m2203	-	-	-	At4m2203	4.4	2.9	2.9
	At0d2204	1.8	1.4	1.58745	At2w2204	1.12	1	1.0583	At1m2204	1.34	1.1	1.21408	At2m2204	2.2	2	2.09762	At3m2204	4.64	4.24	4.43549	At4m2204	3	2.4	2.4
	At0d2205	1.62	1.32	1.46233	At2w2205	1.7	1.44	1.56461	At1m2205	2	1.7	1.84391	At2m2205	1.48	1.26	1.36558	At3m2205	2.48	1.92	2.18211	At4m2205	-	-	-
	At0d2206	1.28	1.2	1.23935	At2w2206	-	-	-	At1m2206	1.4	1.1	1.24097	At2m2206	1.9	1.86	1.87989	At3m2206	4.96	4.48	4.71389	At4m2206	4.2	3	3
	At0d2207	1.46	1.04	1.23223	At2w2207	1.1	0.94	1.01686	At1m2207	1.2	1.1	1.14891	At2m2207	1.9	1.76	1.82866	At3m2207	4.64	4.24	4.43549	At4m2207	6	4.2	4.2
	At0d2208	1.08	0.9	0.985901	At2w2208	1.1	0.8	0.938083	At1m2208	1.7	1.24	1.4519	At2m2208	2	1.52	1.74356	At3m2208	2.4	1.84	2.10143	At4m2208	2.8	2.7	2.7
	At0d2209	1.7	1.4	1.54272	At2w2209	1	1	1	At1m2209	1.8	1.54	1.66493	At2m2209	1.8	1.6	1.69706	At3m2209	2.48	2.24	2.35695	At4m2209	3.3	3	3
	At0d2210	1.24	1	1.11355	At2w2210	0.8	0.8	0.8	At1m2210	1.66	1.4	1.52447	At2m2210	2.4	1.9	2.13542	At3m2210	2.4	2.4	2.4	At4m2210	4.2	4	4
	At0d2211	1.5	1.36	1.42829	At2w2211	-	-	-	At1m2211	1.9	1.4	1.63095	At2m2211	1.74	1.7	1.71988	At3m2211	2.4	2.24	2.31862	At4m2211	5	4.4	4.4
	At0d2212	1.44	1	1.2	At2w2212	1.96	1.56	1.7486	At1m2212	-	-	-	At2m2212	1.9	1.56	1.72163	At3m2212	4.56	3.44	3.96061	At4m2212	-	-	-
	At0d2213	1.8	1.56	1.67571	At2w2213	1.82	1.5	1.65227	At1m2213	1.3	1.16	1.22801	At2m2213	1.6	1.3	1.44222	At3m2213	4.72	4.08	4.38835	At4m2213	4	3.3	3.3
	At0d2214	1.16	1.16	1.16	At2w2214	1.08	1.04	1.05981	At1m2214	0.96	0.96	0.96	At2m2214	1.08	0.96	1.01823	At3m2214	4.64	3.36	3.94847	At4m2214	4.8	4.3	4.3
	At0d2215	1.92	1.6	1.75271	At2w2215	-	-	-	At1m2215	1.2	1.14	1.16962	At2m2215	1.26	0.96	1.09982	At3m2215	2.08	2	2.03961	At4m2215	6.2	4.7	4.7
	At0d2216	1.62	1.28	1.44	At2w2216	1.54	0.9	1.17729	At1m2216	1.2	1	1.09545	At2m2216	2.72	2.08	2.37857	At3m2216	4.16	3.6	3.86988	At4m2216	4.2	3.3	3.3
	At0d2217	1.8	1.34	1.55306	At2w2217	1.6	1.6	1.6	At1m2217	1.76	1.36	1.54713	At2m2217	1.3	1.16	1.22801	At3m2217	2.08	1.84	1.95632	At4m2217	2.5	2.4	2.4
	At0d2218	2.8	1.4	1.9799	At2w2218	1.34	1.14	1.23596	At1m2218	1.2	1.04	1.11714	At2m2218	1.44	1.16	1.29244	At3m2218	2.16	1.68	1.90494	At4m2218	4.2	3.3	3.3
	At0d2219	1.06	1	1.02956	At2w2219	1.4	1.16	1.27436	At1m2219	1.77	1.6	1.68285	At2m2219	1.12	1.02	1.06883	At3m2219	1.52	1.44	1.47946	At4m2219	1.5	1.2	1.2
	At0d2220	1.06	1	1.02956	At2w2220	1.44	1.34	1.3891	At1m2220	1.2	0.74	0.942338	At2m2220	1.7	1.4	1.54272	At3m2220	2	1.52	1.74356	At4m2220	-	-	-
31	At0d3101	2.3	1.84	2.05718	At2w3101	1.24	1	1.11355	At1m3101	1.9	1.5	1.68819	At2m3101	2.68	2.4	2.53614	At3m3101	-	-	-	At4m3101	6.1	5.5	5.5
	At0d3102	-	-	-	At2w3102	-	-	-	At1m3102	1.1	0.94	1.01686	At2m3102	2.68	2.52	2.59877	At3m3102	2.88	2.64	2.75739	At4m3102	4.5	4.2	4.2
	At0d3103	1.66	1.3	1.46901	At2w3103	1.56	1.14	1.33357	At1m3103	1.2	1	1.09545	At2m3103	2.08	1.68	1.86933	At3m3103	3.44	2.72	3.05889	At4m3103	3	2	2
	At0d3104	2.2	2	2.09762	At2w3104	1.44	1.28	1.35765	At1m3104	1.4	1.06	1.2182	At2m3104	2	1.02	1.42829	At3m3104	4.48	3.68	4.06034	At4m3104	4.3	4	4
	At0d3105	1.2	1.04	1.11714	At2w3105	1.54	1.36	1.4472	At1m3105	1.8	1.4	1.58745	At2m3105	2.6	2.4	2.498	At3m3105	3.04	2.56	2.7897	At4m3105	6.3	5.5	5.5
	At0d3106	2	1.68	1.83303	At2w3106	1.46	1.16	1.30138	At1m3106	-	-	-	At2m3106	1.9	1.6	1.74356	At3m3106	4.56	3.36	3.91428	At4m3106	4.2	3.8	3.8
	At0d3107	1.96	1.6	1.77088	At2w3107	0.96	0.84	0.897998	At1m3107	1.2	1.16	1.17983	At2m3107	2	1.84	1.91833	At3m3107	3.04	2.56	2.7897	At4m3107	5	4.7	4.7
	At0d3108	1.7	1.2	1.42829	At2w3108	1.06	1	1.02956	At1m3108	1.04	1	1.0198	At2m3108	1.9	1.86	1.87989	At3m3108	4.16	3.36	3.73866	At4m3108	3.5	3.5	3.5
	At0d3109	1	0.84	0.916515	At2w3109	1.4	1	1.18322	At1m3109	1.1	0.94	1.01686	At2m3109	2.12	1.88	1.9964	At3m3109	2.4	2.24	2.31862	At4m3109	5.4	3.6	3.6
	At0d3110	0.9	0.9	0.9	At2w3110	1.1	1	1.04881	At1m3110	1.3	1.26	1.27984	At2m3110	2.28	2.2	2.23964	At3m3110	-	-	-	At4m3110	4.2	4.1	4.1
	At0d3111	1.7	1.38	1.53167	At2w3111	1.76	1.34	1.53571	At1m3111	1.28	1	1.13137									At4m3111	2.7	2.3	2.3
	At0d3112	1.5	1.14	1.30767	At2w3112	1	0.94	0.969536	At1m3112	1.54	1.36	1.4472									At4m3112	4.7	3.6	3.6
	At0d3113	2.1	1.8	1.94422	At2w3113	1.04	0.8	0.91214	At1m3113	1.14	0.8	0.954987
	At0d3114	-	-	-	At2w3114	1.04	1	1.0198	At1m3114	1.2	0.86	1.01587
	At0d3115	2.14	1.84	1.98434	At2w3115	0.94	0.94	0.94	At1m3115	-	-	-
	At0d3116	1.8	1.44	1.60997	At2w3116	1.4	1	1.18322	At1m3116	1.72	1.26	1.47214
	At0d3117	1.4	0.94	1.14717	At2w3117	1.2	0.9	1.03923	At1m3117	1	0.9	0.948683
	At0d3118	1.1	1	1.04881	At2w3118	1.04	1.04	1.04	At1m3118	1.56	1.1	1.30996
	At0d3119	1.18	1.08	1.12889	At2w3119	1.2	1.02	1.10635	At1m3119	-	-	-
	At0d3120	1.8	1.38	1.57607	At2w3120	1.44	1.1	1.25857	At1m3120	1.14	1	1.06771
	At0d3201	1.8	1.56	1.67571	At2w3201	-	-	-	At1m3201	1.14	1.04	1.08885	At2m3201	-	-	-	At3m3201	3.6	2.8	3.1749	At4m3201	-	-	-
	At0d3202	1.68	1.24	1.44333	At2w3202	1.4	1.3	1.34907	At1m3202	1.38	1.34	1.35985	At2m3202	2	1.68	1.83303	At3m3202	2.32	2.08	2.19672	At4m3202	3.1	2.2	2.2
	At0d3203	1	1	1	At2w3203	1.92	1.6	1.75271	At1m3203	1.14	0.88	1.0016	At2m3203	2	2	2	At3m3203	-	-	-	At4m3203	3.1	2.8	2.8
	At0d3204	1.06	1	1.02956	At2w3204	-	-	-	At1m3204	1.48	1.2	1.33267	At2m3204	2.76	2.36	2.55218	At3m3204	3.04	1.92	2.41595	At4m3204	3.8	3.2	3.2
	At0d3205	2.26	1.7	1.9601	At2w3205	1.68	1.16	1.39599	At1m3205	1.2	0.8	0.979796	At2m3205	2.96	2.32	2.62053	At3m3205	2.64	2.4	2.51714	At4m3205	3	2.4	2.4
	At0d3206	1.56	1.4	1.47784	At2w3206	1.14	1.06	1.09927	At1m3206	1.1	0.9	0.994987	At2m3206	1.88	1.28	1.55126	At3m3206	2.4	2.24	2.31862	At4m3206	-	-	-
	At0d3207	1.54	1.4	1.46833	At2w3207	1.1	1	1.04881	At1m3207	1.48	1.24	1.3547	At2m3207	2.24	2.08	2.15852	At3m3207	-	-	-	At4m3207	4.7	2.9	2.9
	At0d3208	1.48	1.1	1.27593	At2w3208	-	-	-	At1m3208	1.2	1	1.09545	At2m3208	2	1.72	1.85472	At3m3208	2.72	2.56	2.63879	At4m3208	5.5	4.2	4.2
	At0d3209	1.04	1	1.0198	At2w3209	1.04	0.92	0.978162	At1m3209	1.26	1.1	1.17729	At2m3209	2.24	2	2.1166	At3m3209	3.36	2.64	2.97832	At4m3209	2.3	1.7	1.7
	At0d3210	2.24	1.58	1.88128	At2w3210	1	0.82	0.905539	At1m3210	-	-	-	At2m3210	2.32	2	2.15407	At3m3210	2.4	1.92	2.14663	At4m3210	5.2	4.5	4.5
	At0d3211	1.16	1.04	1.09836	At2w3211	1.1	0.9	0.994987	At1m3211	0.9	0.86	0.879773					At3m3211	-	-	-	At4m3211	3.2	2.9	2.9
	At0d3212	1.6	1.3	1.44222	At2w3212	2.2	1.72	1.94525	At1m3212	-	-	-					At3m3212	3.44	2.48	2.92082	At4m3212	2.9	2.8	2.8
	At0d3213	1.58	1.28	1.42211	At2w3213	1.04	0.96	0.9992	At1m3213	-	-	-					At3m3213	3.2	1.84	2.42652	At4m3213	3	2.5	2.5
	At0d3214	1.8	1.46	1.62111	At2w3214	0.98	0.88	0.928655	At1m3214	1.04	0.9	0.967471					At3m3214	3.52	2.8	3.13943	At4m3214	4.4	3.1	3.1
	At0d3215	2.3	1.36	1.76862	At2w3215	-	-	-	At1m3215	1.6	1.28	1.43108					At3m3215	2.88	2.16	2.49415	At4m3215	2.3	2	2
	At0d3216	1.14	1.06	1.09927	At2w3216	0.8	0.8	0.8	At1m3216	1.32	1.2	1.25857					At3m3216	-	-	-	At4m3216	2.3	2	2
	At0d3217	1.06	0.86	0.954777	At2w3217	-	-	-	At1m3217	1.26	0.9	1.06489					At3m3217	1.92	1.76	1.83826	At4m3217	6.4	4.8	4.8
	At0d3218	2.2	1.36	1.72974	At2w3218	2.06	1.9	1.97838	At1m3218	1.1	1	1.04881					At3m3218	3.36	2.88	3.11076	At4m3218	2.7	2.5	2.5
	At0d3219	1.4	1.28	1.33866	At2w3219	1.36	0.84	1.06883	At1m3219	1.2	0.86	1.01587					At3m3219	2.72	2.24	2.46836	At4m3219	5.2	3.9	3.9
	At0d3220	-	-	-	At2w3220	0.8	0.78	0.789937	At1m3220	1.1	1	1.04881					At3m3220	2.16	2	2.07846	At4m3220	-	-	-

## Sheet: 2013Growth
Treatment	0d				1m				2m
	Ind ID	Major	Minor	GMD	Ind ID	Major	Minor	GMD	Ind ID	Major	Minor	GMD
ambient	0d1101	2.4	1.6	1.95959	1m1101	1.48	1.4	1.43944	2m1101	3.36	2.6	2.95567
	0d1102	2.44	2.4	2.41992	1m1102	1.6	1.4	1.49666	2m1102	2.36	1.8	2.06107
	0d1103	2.52	1.84	2.15332	1m1103	1.12	1.12	1.12	2m1103	2.2	2.08	2.13916
	0d1104	-	-	-	1m1104	1.32	1.28	1.29985	2m1104	1.84	1.72	1.77899
	0d1105	2.64	2.28	2.45341	1m1105	1.2	1	1.09545	2m1105	2.2	2.08	2.13916
	0d1106	2.04	1.84	1.93742	1m1106	2.8	1.88	2.29434	2m1106	2.32	1.76	2.02069
	0d1107	1.64	1.52	1.57886	1m1107	1.36	1.2	1.2775	2m1107	2.68	2.6	2.6397
	0d1108	2.48	1.52	1.94155	1m1108	1.72	1.4	1.55177	2m1108	2.32	2.6	2.45601
	0d1109	1.68	1.6	1.63951	1m1109	1.36	1.32	1.33985	2m1109	1.76	1.56	1.65699
	0d1110	1.88	1.2	1.502	1m1110	2	1.6	1.78885	2m1110	2.2	1.96	2.07654
	0d1201	1.4	1.32	1.35941	1m1201	2.4	1.6	1.95959	2m1201	2.28	2	2.13542
	0d1202	1.48	1.28	1.37637	1m1202	1.48	1.16	1.31027	2m1202	2.28	1.88	2.07036
	0d1203	2.32	1.88	2.08844	1m1203	1.6	1.6	1.6	2m1203	2	1.92	1.95959
	0d1204	2.48	2.28	2.3779	1m1204	1.2	0.88	1.02762	2m1204	1.76	1.72	1.73989
	0d1205	2	1.68	1.83303	1m1205	1.92	1.8	1.85903	2m1205	1.56	1.44	1.4988
	0d1206	1.6	1.36	1.47513	1m1206	1.8	1.6	1.69706	2m1206	2.12	1.96	2.03843
	0d1207	2.68	1.88	2.24464	1m1207	1.4	1.08	1.22963	2m1207	2.4	2.12	2.25566
	0d1208	1.72	1.28	1.48378	1m1208	1.84	1.64	1.73712	2m1208	2.24	2.04	2.13766
	0d1209	1.96	1.28	1.58392	1m1209	1.2	1.16	1.17983	2m1209	2.64	2.4	2.51714
	0d1210	2.04	1.72	1.87318	1m1210	1.08	1.08	1.08	2m1210	3.76	2.92	3.31349
	0d1301	3.28	2.32	2.75855	1m1301	1.44	1.36	1.39943	2m1301	2.16	2	2.07846
	0d1302	1.68	1.48	1.57683	1m1302	1.2	1.12	1.15931	2m1302	-	-	-
	0d1303	1.64	1.4	1.51526	1m1303	1.6	1.28	1.43108	2m1303	1.8	1.6	1.69706
	0d1304	1.68	1.52	1.598	1m1304	1.6	1.4	1.49666	2m1304	1.48	1.36	1.41873
	0d1305	1.88	1.4	1.62234	1m1305	2.16	1.2	1.60997	2m1305	1.96	1.92	1.9399
	0d1306	2.48	1.8	2.11282	1m1306	0.16	1.72	0.524595	2m1306	2.16	1.6	1.85903
	0d1307	1.88	1.6	1.73436	1m1307	1.48	1.12	1.28748	2m1307	2.88	2.2	2.51714
	0d1308	1.6	1.28	1.43108	1m1308	1.48	1.32	1.39771	2m1308	2.32	2	2.15407
	0d1309	1.4	1.24	1.31757	1m1309	2.4	1.76	2.05524	2m1309	2.88	2.64	2.75739
	0d1310	1.36	1.12	1.23418	1m1310	1.72	1.48	1.59549	2m1310	3.4	2.08	2.65932
30	0d2101	2.64	1.8	2.17991	1m2101	1.4	1.12	1.2522	2m2101	1.84	1.6	1.71581
	0d2102	1.68	1.4	1.53362	1m2102	1.4	0.92	1.1349	2m2102	1.92	1.84	1.87957
	0d2103	2.56	1.32	1.83826	1m2103	1.48	1.36	1.41873	2m2103	2.12	1.6	1.84174
	0d2104	2.56	1.96	2.24	1m2104	1.6	1.32	1.45327	2m2104	2.12	2	2.05913
	0d2105	2.48	1.96	2.20472	1m2105	1.36	1.36	1.36	2m2105	1.8	1.6	1.69706
	0d2106	2.8	2.08	2.4133	1m2106	1.6	1.36	1.47513	2m2106	1.6	1.48	1.53883
	0d2107	1.48	1.04	1.24064	1m2107	1.8	1.48	1.63218	2m2107	1.88	1.72	1.79822
	0d2108	1.32	1.2	1.25857	1m2108	2	1.68	1.83303	2m2108	-	-	-
	0d2109	1.72	1.72	1.72	1m2109	2.96	1.92	2.38395	2m2109	2	1.8	1.89737
	0d2110	1.4	1.16	1.27436	1m2110	1.64	1.2	1.40285	2m2110	3.48	2	2.63818
	0d2201	1.2	1.2	1.2	1m2201	1.96	1.88	1.91958	2m2201	-	-	-
	0d2202	1.96	1.68	1.81461	1m2202	1.04	0.96	0.9992	2m2202	2	1.8	1.89737
	0d2203	1.2	1.08	1.13842	1m2203	2.4	2.28	2.33923	2m2203	3.08	2.08	2.53109
	0d2204	1.08	1	1.03923	1m2204	2.48	2.28	2.3779	2m2204	2.12	1.88	1.9964
	0d2205	1.2	1.08	1.13842	1m2205	1.56	1.4	1.47784	2m2205	3.68	3.12	3.38845
	0d2206	-	-	-	1m2206	2.6	1.52	1.98796	2m2206	2.28	1.96	2.11395
	0d2207	2.24	1.52	1.84521	1m2207	1.6	1.4	1.49666	2m2207	3	2.68	2.83549
	0d2208	1.4	1.2	1.29615	1m2208	2	1.6	1.78885	2m2208	2.16	1.96	2.05757
	0d2209	2.48	1.8	2.11282	1m2209	1.24	1.08	1.15724	2m2209	2.2	1.92	2.05524
	0d2210	1.2	1.2	1.2	1m2210	1.4	1	1.18322	2m2210	2.64	2.32	2.47483
	0d2301	3.4	2.2	2.73496	1m2301	1.6	1.4	1.49666	2m2301	1.8	1.48	1.63218
	0d2302	1.48	1.2	1.33267	1m2302	2.08	2	2.03961	2m2302	2.08	1.8	1.93494
	0d2303	1.8	1.4	1.58745	1m2303	1.24	1.12	1.17847	2m2303	1.88	1.6	1.73436
	0d2304	1.92	1.4	1.63951	1m2304	1.68	1.48	1.57683	2m2304	1.84	1.8	1.81989
	0d2305	2.04	1.48	1.73758	1m2305	2.32	2.08	2.19672	2m2305	2.04	1.8	1.91625
	0d2306	2.44	1.6	1.97585	1m2306	1.8	1.6	1.69706	2m2306	2.4	1.68	2.00798
	0d2307	1.28	1	1.13137	1m2307	1.6	1.52	1.55949	2m2307	2	1.72	1.85472
	0d2308	1.4	1.12	1.2522	1m2308	1.88	1.2	1.502	2m2308	2.48	2	2.22711
	0d2309	1.4	1.28	1.33866	1m2309	1.6	1.36	1.47513	2m2309	2.4	2.16	2.27684
	0d2310	1.6	1.2	1.38564	1m2310	1.28	1.2	1.23935	2m2310	2.92	2.32	2.60277
32	0d3101	1.28	0.96	1.10851	1m3101	-	-	-	2m3101	1.92	1.52	1.70833
	0d3102	2.28	2	2.13542	1m3102	-	-	-	2m3102	1.6	1.52	1.55949
	0d3103	1.4	1.28	1.33866	1m3103	2	1.32	1.62481	2m3103	2.12	1.92	2.01752
	0d3104	1.4	1.2	1.29615	1m3104	0	0
	0d3105	1.36	1.28	1.31939	1m3105	1.8	1.48	1.63218
	0d3106	1.12	1.08	1.09982	1m3106	1.6	1.2	1.38564
	0d3107	1.04	1	1.0198	1m3107	2.32	2	2.15407
	0d3108	1.08	0.92	0.996795	1m3108	-	-	-
	0d3109	1.2	1	1.09545	1m3109	2	1.92	1.95959
	0d3110	1.36	1.2	1.2775	1m3110	0	0	0
	0d3201	2.28	2	2.13542	1m3201	1.8	1.52	1.65409	2m3201	1.92	1.68	1.796
	0d3202	2.2	2.2	2.2	1m3202	2.2	1.48	1.80444	2m3202	1.4	1.2	1.29615
	0d3203	2.2	2	2.09762	1m3203	1.12	1.08	1.09982	2m3203	2.08	1.8	1.93494
	0d3204	1.08	1	1.03923	1m3204	1.08	0.92	0.996795	2m3204	1.8	1.6	1.69706
	0d3205	2.08	1.4	1.70646	1m3205	-	-	-	2m3205	3.4	2.6	2.97321
	0d3206	2.68	1.2	1.79332	1m3206	1.8	1.6	1.69706	2m3206	1.8	1.48	1.63218
	0d3207	1.92	1.4	1.63951	1m3207	1.28	1.2	1.23935	2m3207	3.16	2.96	3.05837
	0d3208	2.12	1.12	1.54091	1m3208	1.92	1.2	1.51789	2m3208	1.6	1.48	1.53883
	0d3209	2.2	1.88	2.03372	1m3209	1.8	1.4	1.58745	2m3209	-	-	-
	0d3210	2.52	1.92	2.19964	1m3210	-	-	-	2m3210	2.68	2.2	2.42817
	0d3301	1.36	1.24	1.29861	1m3301	1.72	1.48	1.59549	2m3301	2.28	1.28	1.70833
	0d3302	1.2	1	1.09545	1m3302	1.28	1.16	1.21852	2m3302	2.28	1.6	1.90997
	0d3303	1.2	1.2	1.2	1m3303	1.4	1.08	1.22963	2m3303	1.6	1.32	1.45327
	0d3304	1.8	1.6	1.69706	1m3304	3.12	2.6	2.84816	2m3304	1.6	1.36	1.47513
	0d3305	1.88	1.2	1.502	1m3305	1.8	1.52	1.65409	2m3305	1.52	1.4	1.45877
	0d3306	1.2	1.08	1.13842	1m3306	2.12	1.44	1.74723	2m3306	2.12	1.84	1.97504
	0d3307	1.28	1.2	1.23935	1m3307	1.28	1.2	1.23935	2m3307	1.24	1.2	1.21984
	0d3308	1.4	1.12	1.2522	1m3308	1.48	1.44	1.45986	2m3308	1.4	1.2	1.29615
	0d3309	1.12	1.08	1.09982	1m3309	1.48	1.4	1.43944	2m3309	1.52	1.2	1.35056
	0d3310	1.6	1.36	1.47513	1m3310	2.12	1.24	1.62136
